# Supplementary material
Source: publisher figshare collection journal article supplement (https://sage.figshare.com/ndownloader/files/14507435)
Supplement: Supplementary file 1 [file 14507435]

# TRANSITION TO EMERGING ADULthood FOR YOUNG AUTISTIC PEOPLE

Supplementary Table 1. *Interview schedules.*

| Participant  | Primary question                                                                      | Question Prompts                                                                                                                                                                                                                                                                                                                                                                                                                                                                                                                                                                                                                                                             |
|--------------|---------------------------------------------------------------------------------------|------------------------------------------------------------------------------------------------------------------------------------------------------------------------------------------------------------------------------------------------------------------------------------------------------------------------------------------------------------------------------------------------------------------------------------------------------------------------------------------------------------------------------------------------------------------------------------------------------------------------------------------------------------------------------|
| Young person | Tell me a bit about what school is/was like – the good bits and the not-so-good bits. | <p>Are there particular subjects/teachers you like/dislike?</p> <p>Do you get enough help if you need it? By whom? Can you give me an example of a time when you needed help?</p> <p>What is/was your favourite thing about school?</p> <p>What do/did you find the most challenging at school?</p> <p>If you could change some things about school, what would you change?</p> <p>Do you think your lessons are/were too easy/too hard/just right?</p> <p>Do/did people listen to you at school?</p> <p>Do you feel like people understand you at school?</p>                                                                                                               |
|              | Tell me about your friends. Tell me about your family.                                | <p>Do you have some friends? Tell me about them, what are their names?</p> <p>Would you like to have more friends? Or fewer friends? Why?</p> <p>Do you have people you talk to when things are tough, or if you're worried? If yes, who would you talk with? Does it help to talk? If no, I often find it helps to talk to others, do you think it would be good to have people to talk to about these things?</p> <p>Do you struggle to get along with your friends sometimes? Why do you think that is?</p> <p>Do they know you have autism? Do they understand what that means?</p> <p>What about family, do you get on well with them? Do they understand you well?</p> |
|              | What are you hoping to do in the future?                                              | <p>What job/study would you like to do next? Why?</p> <p>How did you come up with this plan? Did/are school/your parents supportive of this plan? Why/why not?</p> <p>What do you need to do in order to make your plan happen?</p> <p>What might be difficult about achieving that plan?</p>                                                                                                                                                                                                                                                                                                                                                                                |

## TRANSITION TO EMERGING ADULthood FOR YOUNG AUTISTIC PEOPLE

|         |                                                                                                                                                                   |                                                                                                                                                                                                                                                                                                                                                                                                                                                                                                    |
|---------|-------------------------------------------------------------------------------------------------------------------------------------------------------------------|----------------------------------------------------------------------------------------------------------------------------------------------------------------------------------------------------------------------------------------------------------------------------------------------------------------------------------------------------------------------------------------------------------------------------------------------------------------------------------------------------|
|         |                                                                                                                                                                   | <p>Where would you like to live? On your own/with friends/family?</p> <p>What about when you're older, do you think that might change for any reason?</p> <p>Do you have a girlfriend or boyfriend? If yes, how long have you had one?</p> <p>Do you think you'll get married at some point? Have children?</p>                                                                                                                                                                                    |
|         | How much say do you have in how your life is like?                                                                                                                | <p>Do you get to decide where you go after school/on weekends, who you spend time with</p> <p>Do you feel like you have enough say in your plans for the future? Would you like to have more say?</p> <p>Are you getting enough help from school/home to do these things?</p> <p>What would help you right now to make it easier to achieve the things you want to do?</p>                                                                                                                         |
|         | How would you describe yourself?<br>How do you think of yourself?                                                                                                 | <p>Are there things in particular that worry you?</p> <p>Do you think you are different from other people your age? Why, how so?</p> <p>Do other people think of you as different? Does that help or does it bother you?</p> <p>Are there advantages to being different? What about disadvantages? What's not-so-good about being different?</p> <p>Are there things the people you work with/go to school with could change to make your life easier/better? What kinds of things?</p>            |
| Parents | Tell me a bit about how your child is currently getting on?<br>How do you think they've changed over the last 10 years?<br>What do you think has helped the most? | <p>Are they in school at the moment? If not, do they work or how do they spend most days?</p> <p>If yes, does s/he like school? Why/why not?</p> <p>What kind of things does your child like to do/what are they good at? Which areas do they find a little more difficult?</p> <p>How would you say they generally feel about their life at the moment?</p> <p>What about friends, does s/he have some friends they spend time with? Do you think they would like to have more/fewer friends?</p> |

# TRANSITION TO EMERGING ADULthood FOR YOUNG AUTISTIC PEOPLE

|  |                                                                                             |                                                                                                                                                                                                                                                                                                                                                                                                                                                                                                                                                                                                                                                                                                                                       |
|--|---------------------------------------------------------------------------------------------|---------------------------------------------------------------------------------------------------------------------------------------------------------------------------------------------------------------------------------------------------------------------------------------------------------------------------------------------------------------------------------------------------------------------------------------------------------------------------------------------------------------------------------------------------------------------------------------------------------------------------------------------------------------------------------------------------------------------------------------|
|  |                                                                                             | What is the biggest challenge they are facing right now?                                                                                                                                                                                                                                                                                                                                                                                                                                                                                                                                                                                                                                                                              |
|  | How well do you feel the school is supporting/supported your child?                         | <p>Are they/did they do enough to support your child's needs?</p> <p>Was it a challenge to secure this support for them?</p> <p>What kind of additional supports does the school offer?</p> <p>Which things do the school do really well?</p> <p>What would you like to see more/less of from the school?</p> <p>If there were one thing you would change about his/her experience at school, what would it be?</p> <p>To what extent do you feel s/he has been included in the important decisions about their education/school experience? And to what extent do you think they <i>should</i> they have been included?</p> <p>How have the school supported/supporting your child in transitioning from school into adult life?</p> |
|  | How do you think your child sees him/herself in relation to other young people his/her age? | <p>Do they see themselves any differently from other young people their age?</p> <p>Do you think that having autism at their age presents significant challenges to them?</p> <p>How do you think they feel about their autism? Are they proud of it/frustrated with it? Do they talk about it?</p> <p>In what way, if any, has it had an effect on how other people interact with your child?</p>                                                                                                                                                                                                                                                                                                                                    |
|  | What do you see happening in your child's future?                                           | <p>After they finished school/college, what are your aspirations for your child?</p> <p>Do your plans differ from theirs? If yes, why?</p> <p>Do you think their aspirations for themselves are high enough/too high? Why?</p> <p>How did this plan come about? How much were they/the school/you involved?</p> <p>What about having a partner? Children? Deciding where to live?</p>                                                                                                                                                                                                                                                                                                                                                 |
